# Supplementary material
Source: PubMed Central journal article supplement (PMC4868421)
Supplement: pnas.1601591113.sapp.pdf [file pnas.1601591113.sapp.pdf]

## SI Appendix

### *Inter-sample similarity/distance measures*

The gene sets used in this paper are given in Supplementary Tables and described in Supplementary Materials. The distance measures used in this paper were:

- 1) **Similarity by SNAs** - inner (dot) product of per-gene indicator vectors (1=impacted by non-synonymous SNA, 0=not impacted).
- 2) **Similarity by CNAs** - inner (dot) product of per-gene thresholded GISTIC scores (-2=homozygous loss, -1=single copy loss, +1=single copy gain, +2=multi-copy amplification).
- 3) **Joint similarity by SNAs and CNAs** - sum of the *normalized* genome-wide SNA and CNA similarity scores such that the sum of all SNA scores equals the sum of all CNA scores, equals 1.
- 4) **Similarity by expression and CNA combined** - inner product of per-gene expression Z-scores & thresholded GISTIC scores (as defined in (2) above).
- 5) **G-CIMP DNA methylation probes** – In 2010, a TCGA publication by Noushmehr et al (Cancer Cell. 2010 May 18;17(5):510-22) identified 1503 Illumina Infinium 27K array classifier probes that reliably identified hyper-methylated (G-CIMP) samples. We used 1444 of these probes, which had an exact match to the probe names in our Infinium 450K DNA methylation array data.
- 6) **Correlated methylation and expression** – We used the Bioconductor package "FDb.InfiniumMethylation.hg19" (<http://bioconductor.org/packages/release/data/annotation/html/FDb.InfiniumMethylation.hg19.html>) to identify CpG island probes within 2Kbp upstream of the transcription start sites of genes. Among these probes, we selected the top 8000 probes with the greatest Median Absolute Deviation. Probe beta values were averaged on a per gene basis and then used to calculate Spearman's rank correlation as a measure of sample similarity.
- 7) **Expression of stemness marker genes** – We used Manhattan distance ( $p=1$  Minkowski distance).
- 8) **Expression of metabolic genes** – Sample similarities for the selected genes were visualized using Principle Component Analysis (PCA).
- 9) **Immune gene expression** – We performed Single Sample Gene Set Enrichment Analysis (ssGSEA, Bioconductor package <http://www.bioconductor.org/packages/release/bioc/html/GSVA.html>) using the 1910 gene sets from C7 collection of the MSigDB database (<http://www.broadinstitute.org/gsea/msigdb/collections.jsp>). The Manhattan distances of the ssGSEA score matrices were used as input to MDS.

### *Calculation of approximate p-values for detected sample clusters*

We performed permutation-based tests to assess if visually identified sample clusters are significantly clustered compared to the rest of the samples. Briefly, for each identified cluster, we compute all pairwise distances within the cluster. Additionally, we compute all pairwise distances for all genes outside of the cluster. Then, we evaluate if these two sets of distances are statistically different from each other by computing a Z-score. Since pairwise distances are correlated, such Z-scores do not have any known statistical properties which can be used to derive a p-value. Hence, 10,000 permutations of the plot data are created under the null hypothesis, and are used to create a distribution of Z-scores.

The observed distance is then compared to null distribution to produce a p-value. For brevity, in Supplementary Materials, we refer to this measure of cluster significance as the “Within Clusters” comparison. Note that the computed p-value is an approximation and quantifies the strength of the visually observed clusters, since creating “clustering patterns by visualization” under the null is nearly impossible.

One potential weakness associated with the above measure is that it may fail to flag a user-selected cluster as significant if the samples outside the selected cluster are also tightly bunched together, resulting in comparable within-cluster distances for the selected cluster and control samples. To address this issue, we introduce a complementary measure: the difference between within-cluster distances for the selected cluster and the distances between every member of the selected cluster and every sample outside of the cluster. For brevity, in Supplementary Materials, we refer to this measure of cluster significance as the “Between Clusters” comparison. Again, we use a permutation strategy to compute an observed Z-score and a Z-score distribution for the null hypothesis.

For all of the eight clusters delineated in Figure 3, the observed Z-scores are well outside of their null distributions, and hence their p-values are below the low bound of the permutation exercise, i.e., 1/10000.

#### *Differential expression/ methylation analysis*

Differential expression analysis was performed with the Bioconductor package ‘limma’ (<http://bioconductor.org/packages/release/bioc/html/limma.html>) using the batch-effect corrected RNA-seq data. Differential methylation analysis was performed with the Bioconductor package ‘DMRcate’ (<http://www.bioconductor.org/packages/release/bioc/html/DMRcate.html>) using batch-effect corrected probe values. We found 1,808 differentially expressed genes and 620 differentially methylated regions containing 11,127 probes across 658 genes.

## Supplementary Materials

### *Motivation for sample similarity plots*

The millions of molecular data points (per patient) that are generated with high-throughput sequencing, array platforms, and proteomics, make brute-force, statistical, machine-learning, and other commonly-used ‘unbiased’ methods for discovering patient groups extremely inefficient. This limitation is fundamental. With only two dimensions (measurements), unsupervised clustering algorithms can identify distinct patient groups fairly reliably. But the efficiency of unsupervised clustering drops precipitously as the number of measurements grows, for the following reasons:

- (1) Improvements in resolution when we measure multiple genes per patient only grow as the square root of the number of measurements. For example, measuring the expression level of 10,000 genes (instead of one) can increase the straight-line distance among samples in a scatter plot at most 100-fold. The figures below visually demonstrate this property for 1, 2 and 3 dimensions (measured values).

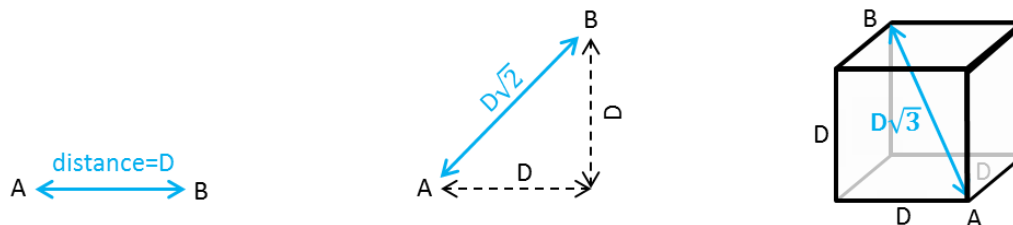

A remarkable consequence of this effect is that the distance difference between the nearest and farthest neighbors in a scatter plot shrinks as the number of dimensions (biomarkers) increases, thus making unambiguous assignment of points to clusters difficult and error prone.

Expert-guided Visual Exploration (EVE) addresses this challenge by relying on human visual pattern recognition capabilities, both when detecting sample clusters in 2 or 3D plots, and in selecting parameters for automated sample clustering.

- (2) Clustering relies on calculating similarity distances among samples. The efficiency of computing distances falls with the number of measurements made. Measuring sample distances across millions of dimensions – as is the case for genomic medicine – becomes prohibitive for  $>O(1000)$  patients.
- (3) As the number of measurements ( $N$ ) increases, a larger fraction of the possible biomarker values for any given sample will be “tucked away” in the corners of an  $N$ -dimensional scatter plot. In other words, high-dimensional data is inherently fragmented. This fragmentation makes it difficult to identify subsets of biomarker groups that cluster patients in biologically meaningful ways.

The above effect is illustrated in the figures below. With only two measurements (left panel), the area of the largest circle inside the 2D box of all possible biomarker values covers more than 78% of the total area of the box. Thus, if all measured values were distributed uniformly across

samples, more than 78% of the patients would fall inside this 'central' circle. With three biomarkers, the area of the largest sphere contained in the 3D cube of all possible biomarker combinations is only ~52% of the volume of the cube (right panel). For 10 biomarkers, this fraction becomes less than 2.5% of the measurement space. Thus when millions of molecular species are measured, there are virtually no 'average' patients; everybody is 'special' in some way (dimension), which makes clustering difficult.

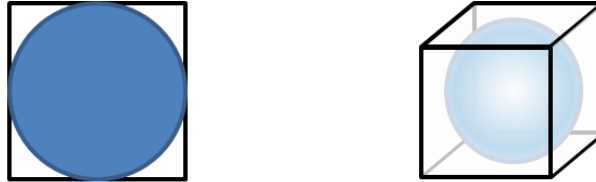

EVE circumvents this challenge by relying on the domain-knowledge of expert users to nominate candidate gene/probes sets for delineation of specific sample subtypes.

- (4) The common approach of combining measurements of different biomolecular entities (e.g. gene mutations and DNA-methylation probe  $\beta$ -values) into a single measure of similarity/distance among samples is problematic because in biology we do not currently have 'laws' governing the relationships among different measurable quantities (cf. volume and pressure, or energy, mass, and displacement in physics). To overcome this issue, clustering of biomarkers is often performed for one data type at a time, but then integration across multiple measurements is performed in arbitrary ways.

Because EVE allows users to select from among multiple methods, measures, and parameters, users can interactively explore the relative merits of different approaches to combining data types.

- (5) Automated (statistical/algorithmic) clustering methods come in many flavors, each with its own limitations, such as sensitivity to outliers, inability to detect concave clusters, or using approximations that may not hold in some cases.

EVE provides a flexible framework in which users can explore the effect of changes in cluster methods, distance measures, etc.

## Supplementary Figures

**Supplementary Figure 1.** Multiple subsets of genome-wide methylation probes unambiguously divide TCGA glioma samples into CIMP and non-CIMP groups. (a) Using the published 1503 CIMP classifier probes, the samples divide sharply into two groups: CIMP (red) and non-CIMP (blue). (b) Sample similarity using all probes located in gene bodies. Samples are colored according to panel (a). (c) Sample similarity using all probes located in promoters (defined as within 1000bp of transcription start sites). Samples are colored according to panel (a). (d) Sample similarity using only the 80000 most variable probes across all samples. Samples are colored according to panel (a).

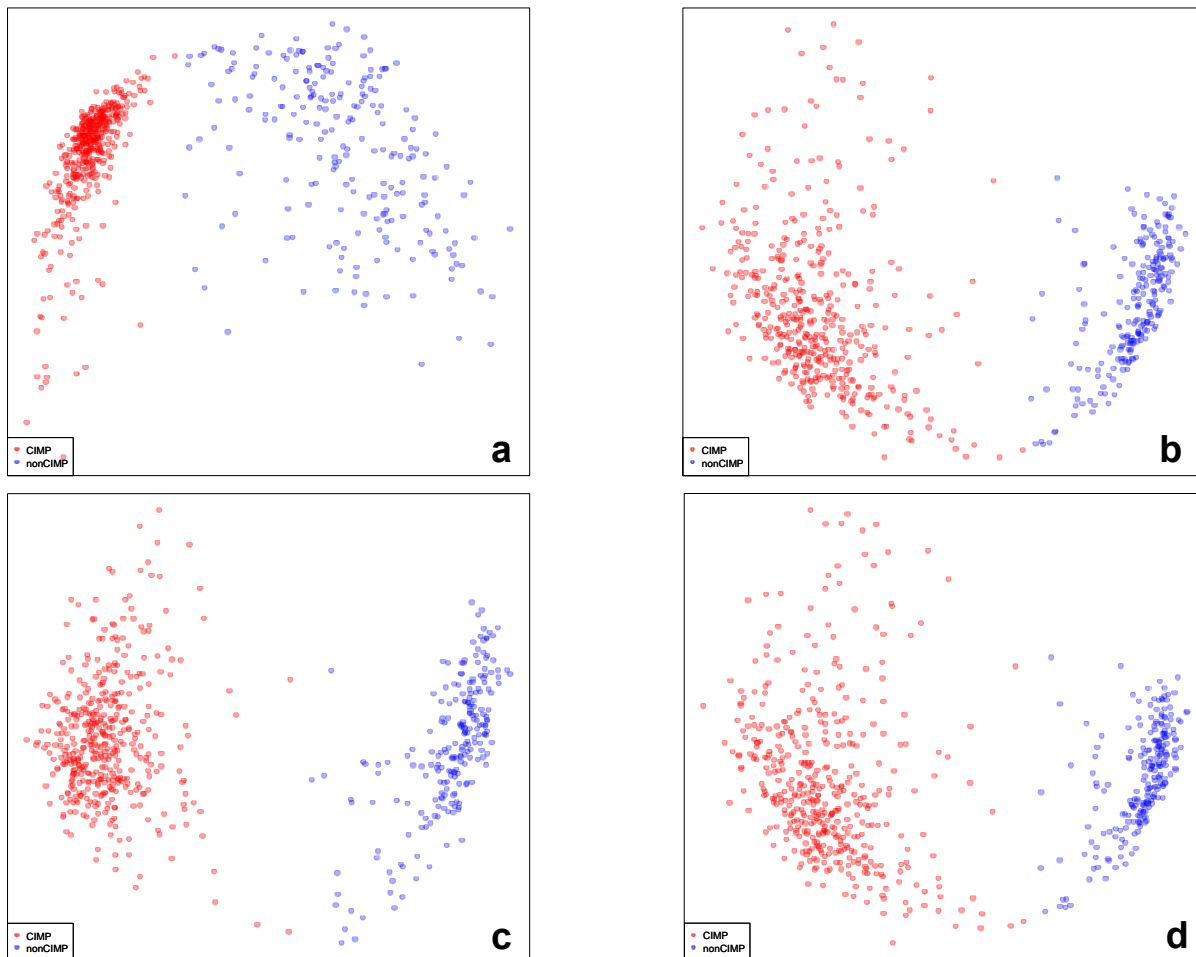

**Supplementary Figure 2(a).** Approximately computed P-values for cluster 1 of Figure 3.

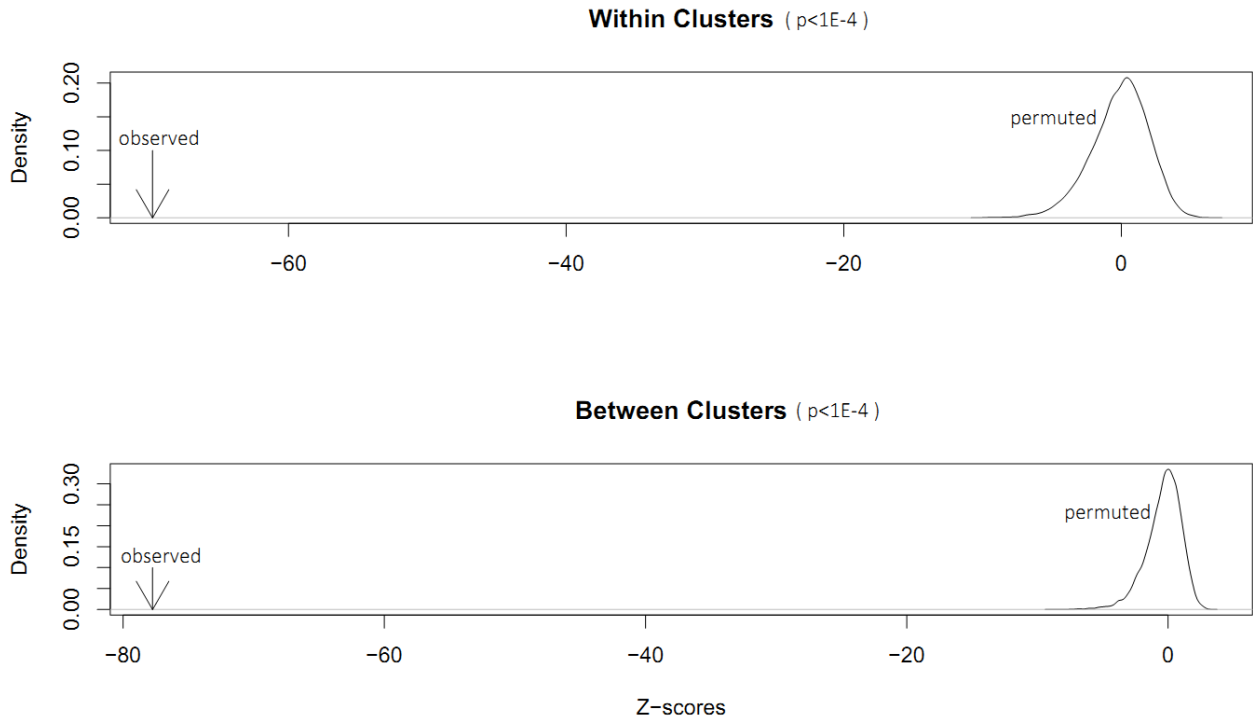

**Supplementary Figure 2(b).** Approximately computed P-values for cluster 2 of Figure 3.

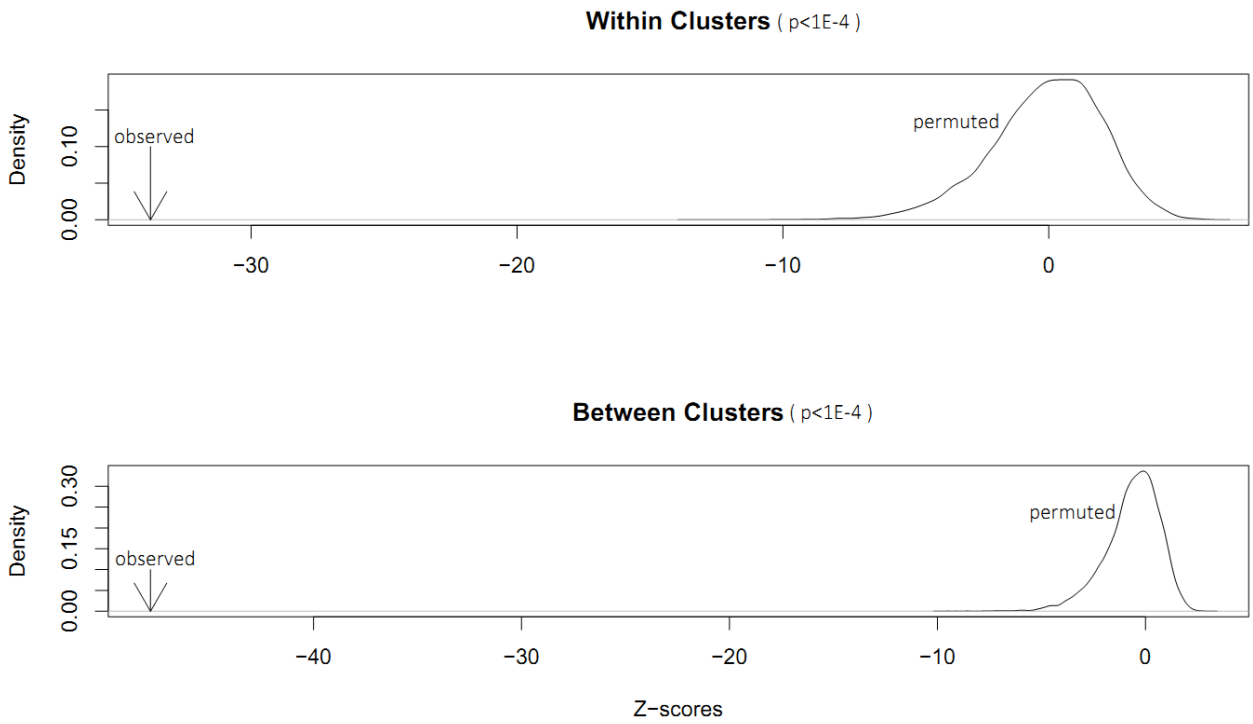

**Supplementary Figure 2(c).** Approximately computed P-values for cluster 3 of Figure 3.

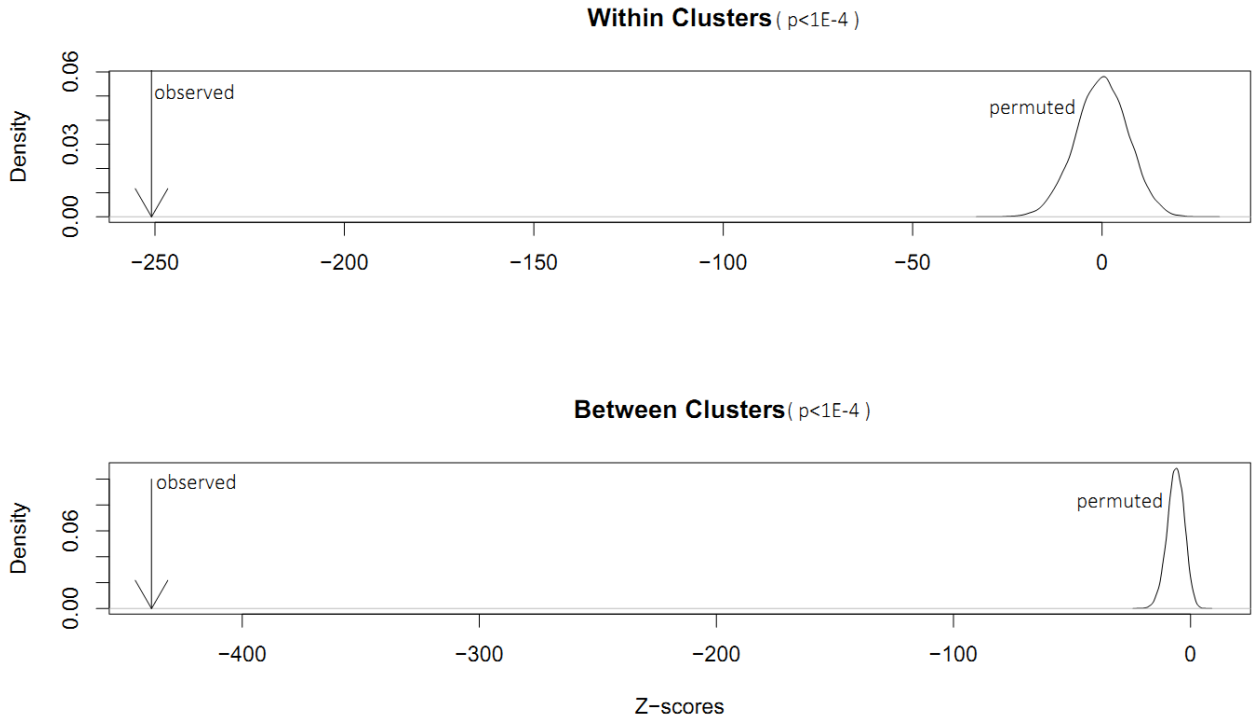

**Supplementary Figure 2(d).** Approximately computed P-values for cluster 4 of Figure 3.

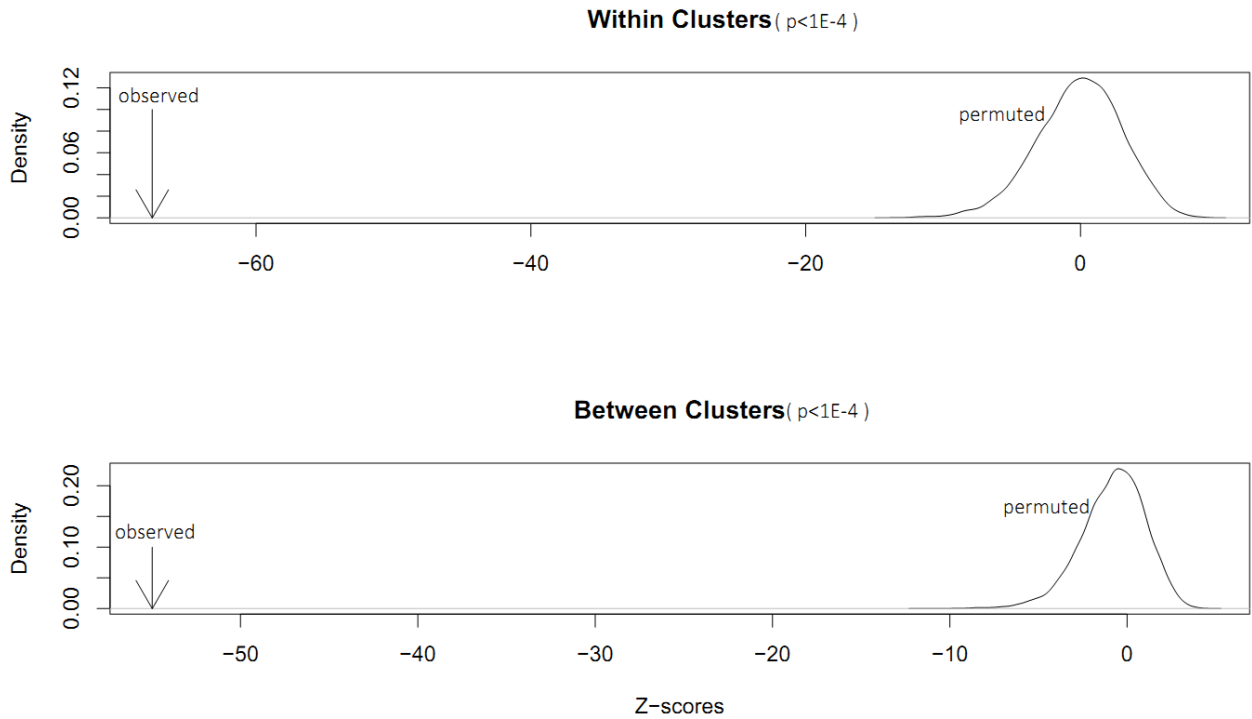

**Supplementary Figure 2(e).** Approximately computed P-values for cluster 5 of Figure 3.

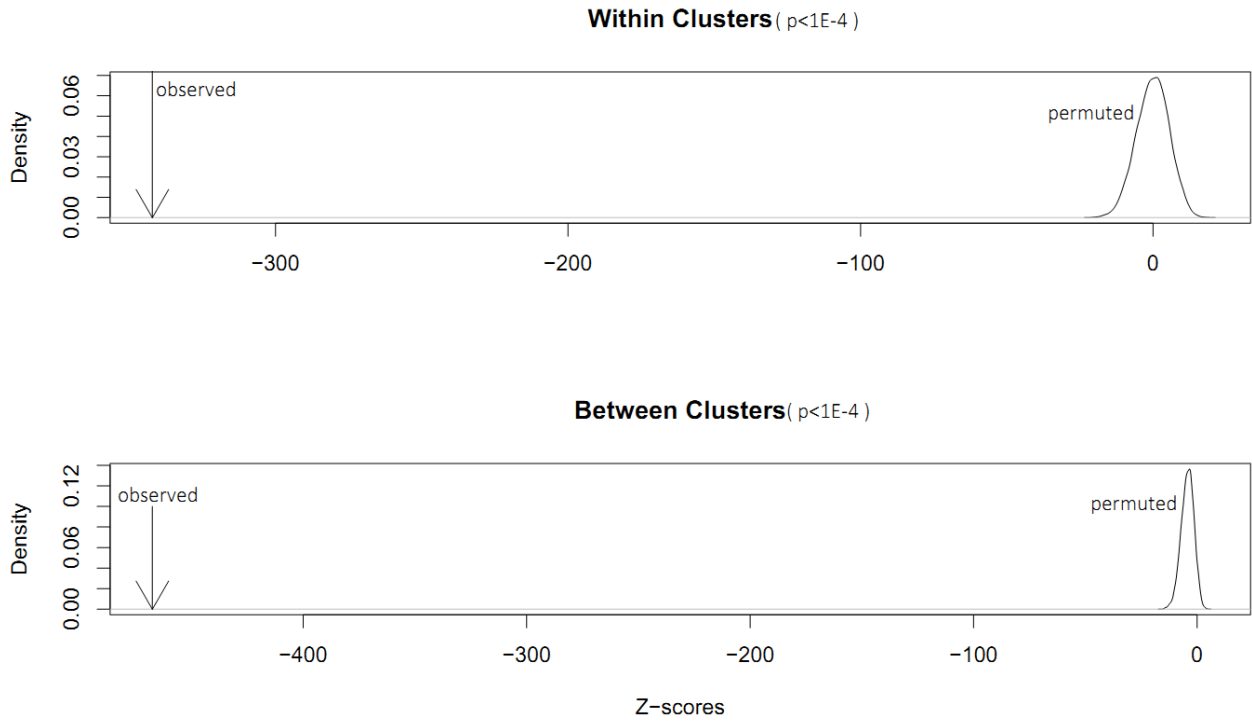

**Supplementary Figure 2(f).** Approximately computed P-values for cluster 6 of Figure 3.

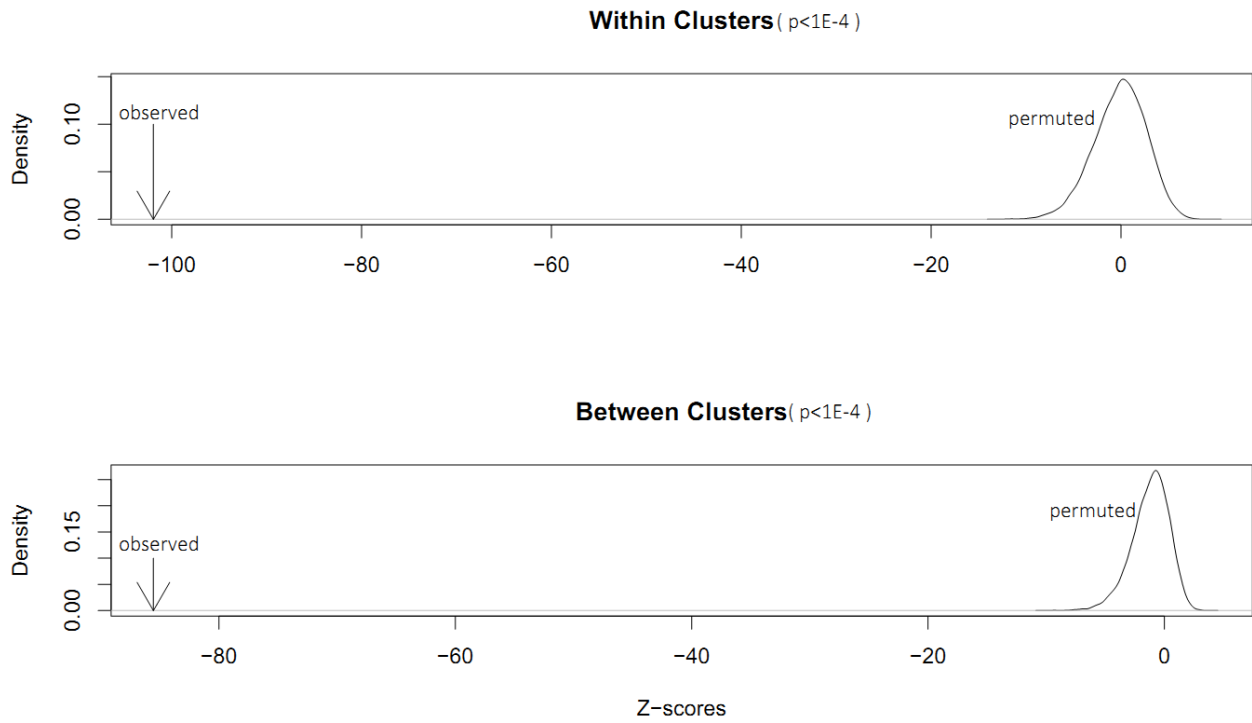



**Supplementary Figure 2(g).** Approximately computed P-values for cluster 7 of Figure 3.

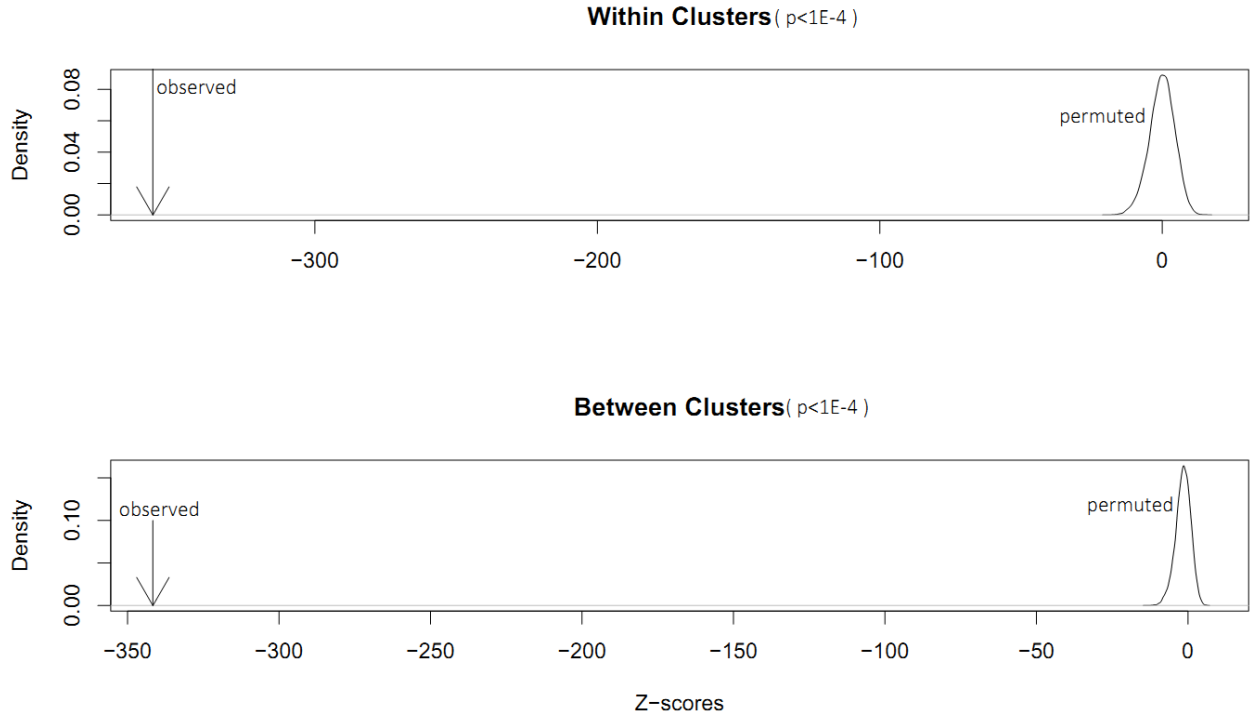

**Supplementary Figure 2(h).** Approximately computed P-values for cluster 8 of Figure 3.

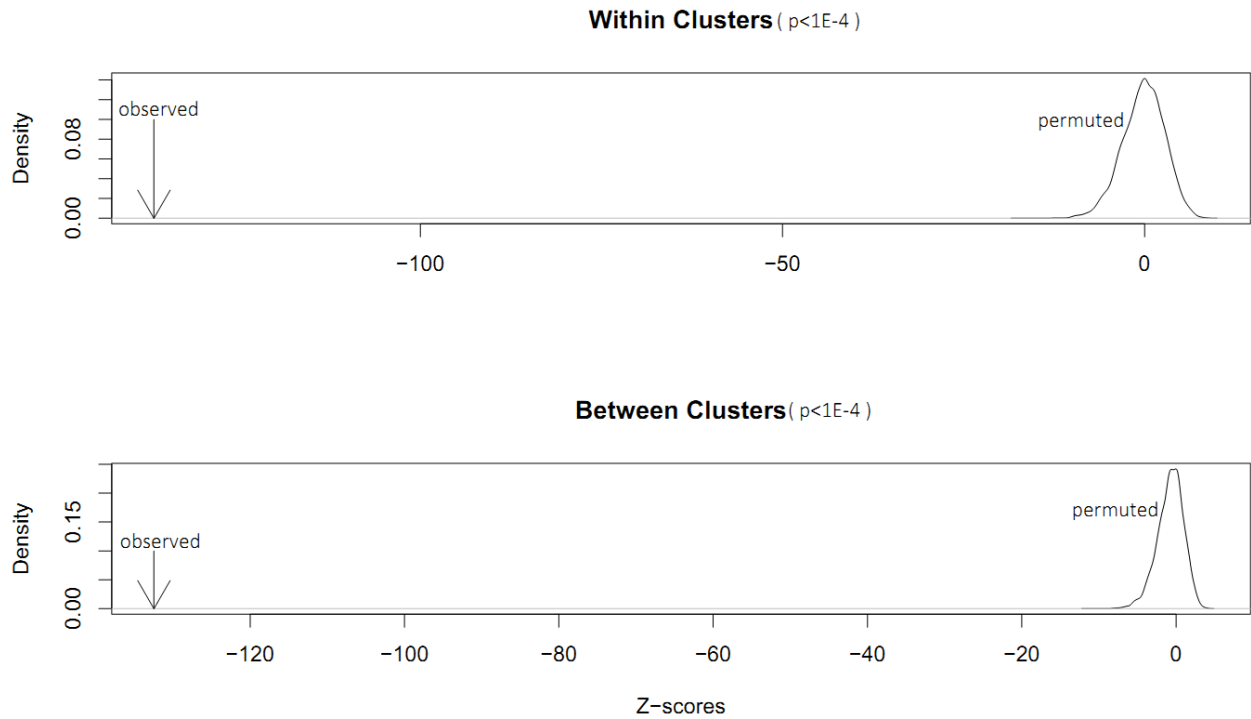

**Supplementary Figure 3**, The TCGA GBM expression subtypes are not regionally distributed in our genomic sample-similarity plot. The units of the horizontal and vertical axes are arbitrary.

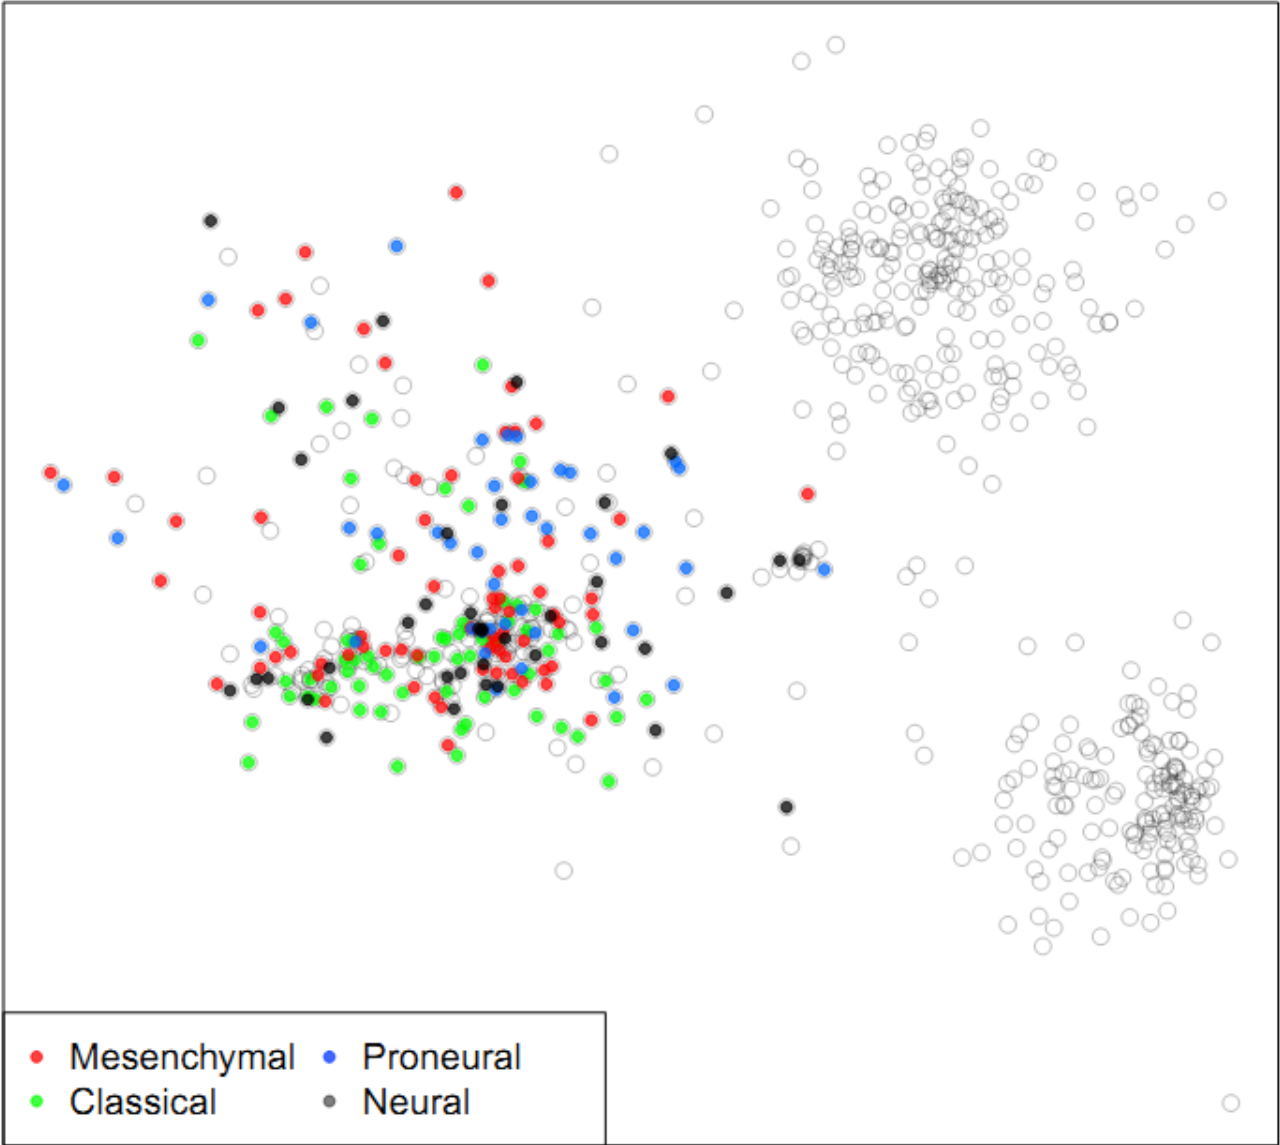

**Supplementary Figure 4.** The distribution of tumor grades in the SNA/CNA sample similarity plot. The units of the horizontal and vertical axes are arbitrary.

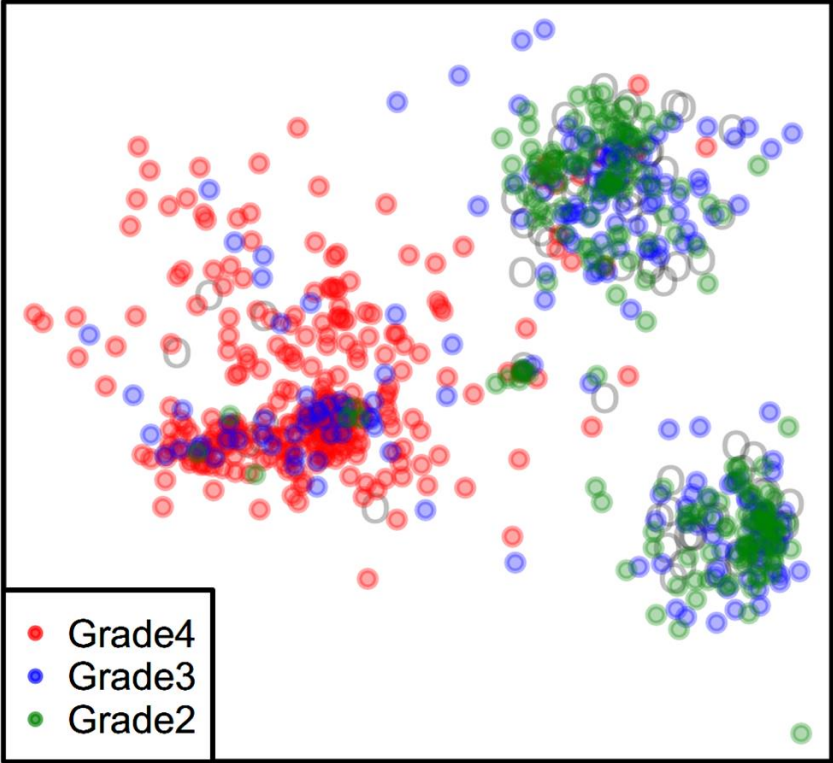

**Supplementary Figure 5.** The proliferation markers MKI67 and PCNA are not regionally distributed in the SNA.CNA sample similarity plot, in contrast to similarity by stemness marker gene expression. Expression levels were divided into 3 quartiles and colored differentially for ease of visualization.

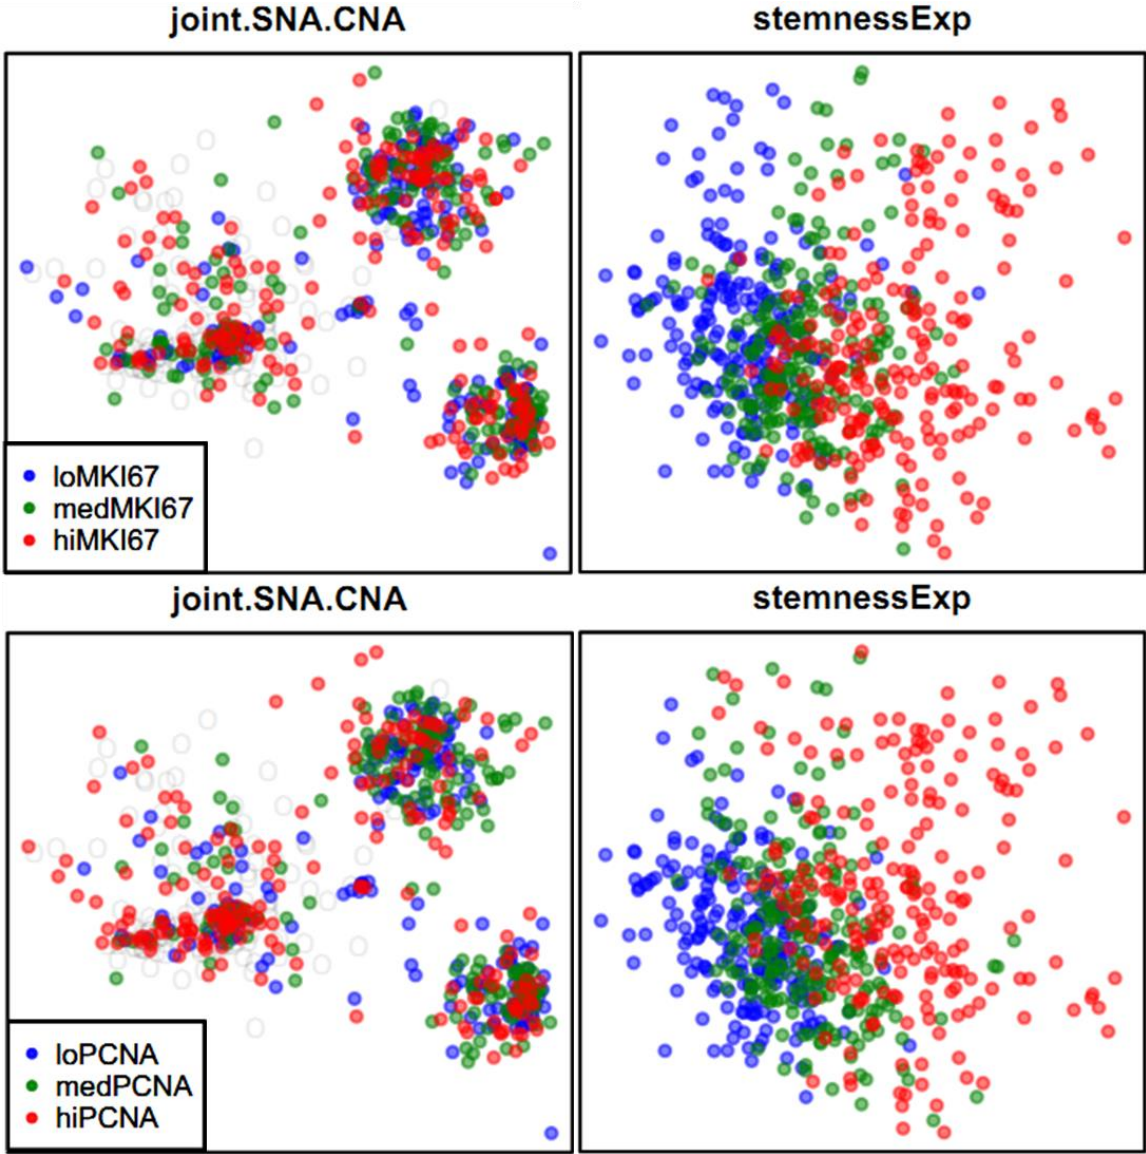

**Supplementary Figure 6.** Sample placement on the sample similarity plot is robust and offers an intuitive approach to classifying new patients given a large number of ‘training set’ samples (e.g. TCGA data). To explore the ability of EVE to correctly classify new samples (generalization), we performed leave-one-out (LOO) validation. In each LOO iteration, one sample is left out of the ‘training set’ used to generate the SNA.CNA sample similarity plot. This sample is then super-imposed onto the plot by triangulation, and its position is compared to its position in the equivalent plots without any sample removal.

MDS projection of high dimensional data preserves inter-sample distances, not the locations of the samples in different plots. To accommodate this characteristic when comparing before and after sample coordinates, in the panel below left the coordinates of each plot point are calculated as the centroid of the three nearest neighbors in full dimensional space. We first estimated the location of each sample by the centroid of its three nearest neighbors using the full data. The result is shown in blue. We then removed one sample at a time from the plot, re-calculated the MDS projection of the resulting inter-sample distances, and then re-estimated the location of the missing sample from its previously marked three nearest neighbors. The resulting sample centroid locations are plotted in red (empty circles mark sample locations given full data). Overall, >96% of samples have identical actual and predicted nearest neighbors across all LOO runs. Even including outlier samples (for which neighbor-centroid calculations are inappropriate), the LOO and actual nearest neighbors are the same for >96% of all samples.

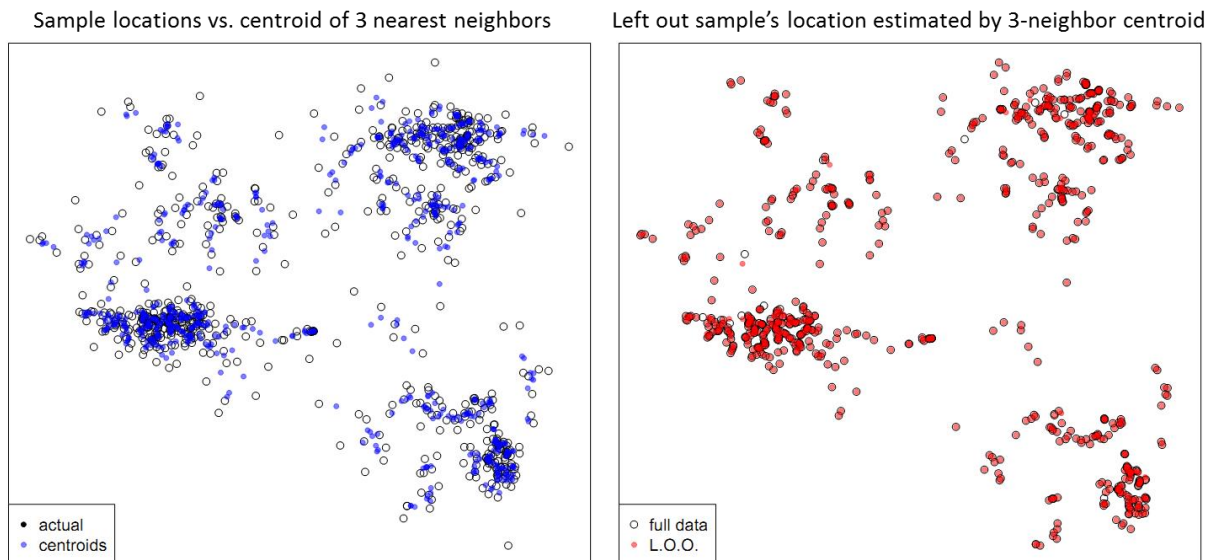

**Supplementary Figure 7.** 1000 DNA methylation probes are sufficient to perfectly distinguish the two subtypes of CIMP LGGs. Colors are the same as in Figure 2f.

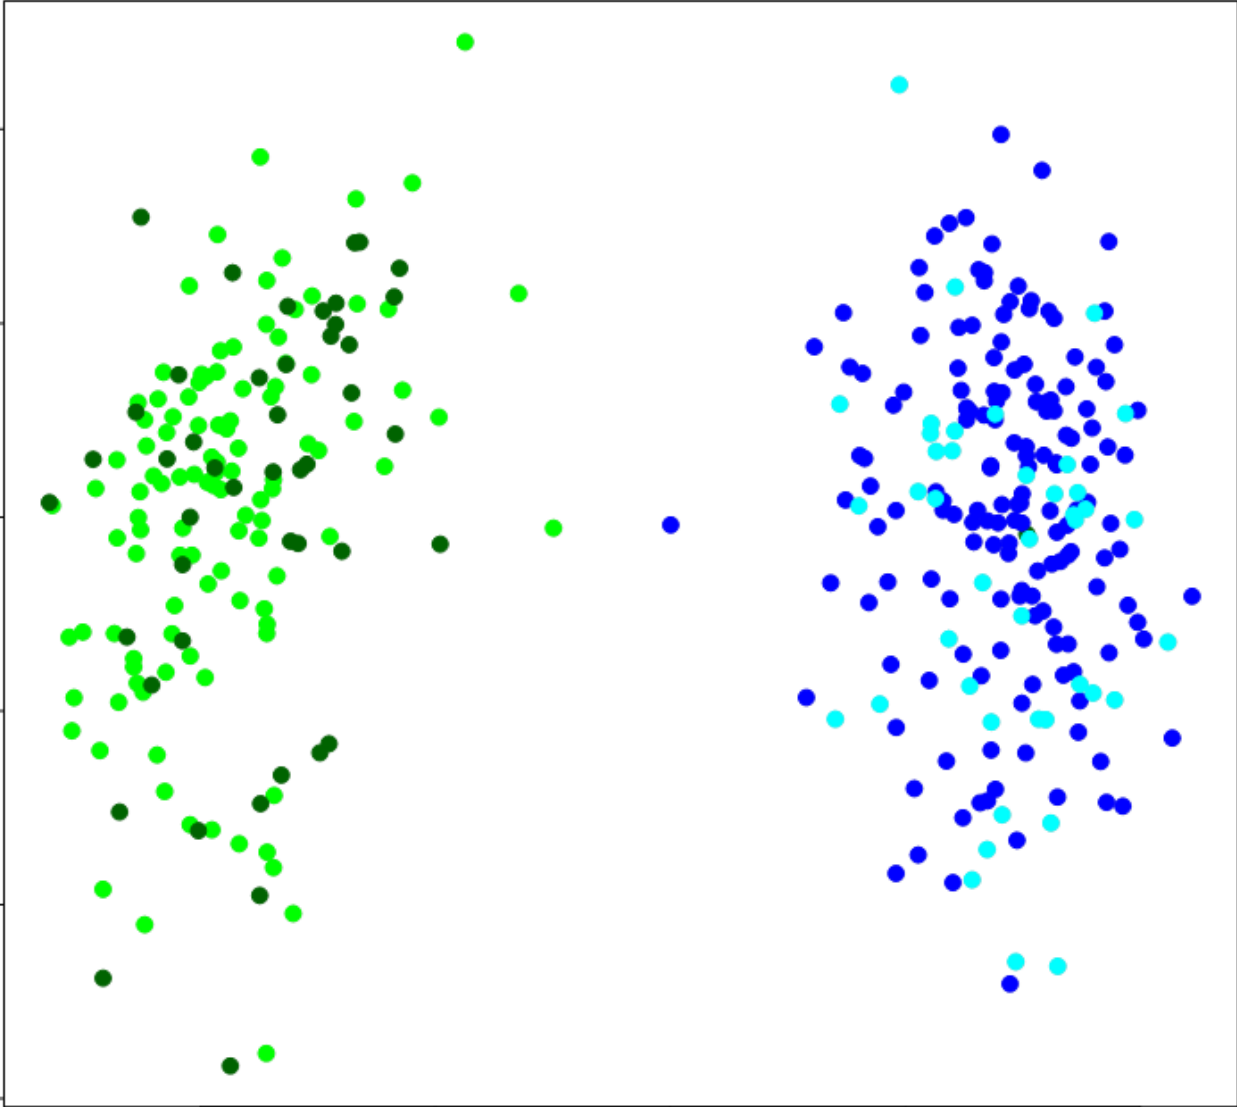

**Supplementary Figure 8.** The three major clusters detected by genomic data have distinct methylation expression profiles. (A) Methylation levels of 4,500 probes re-capitulate the three genomic clusters. Inset: 1000 probes are sufficient to segregate the Astro and Oligo CIMP LGG clusters. (B) REST/NRSF methylation levels are lower in the Astro cluster compared to the Oligo cluster. (C) Consistent with (B), REST/NRSF mRNA expression levels are higher in the Astro cluster compared to the Oligo cluster. (D) Consistent with (B) and (C), the NRSF co-repressor HDAC1 is expressed at significantly lower levels in the Oligo cluster (Benjamini and Hochberg FDR adjusted p-value = 0.03).

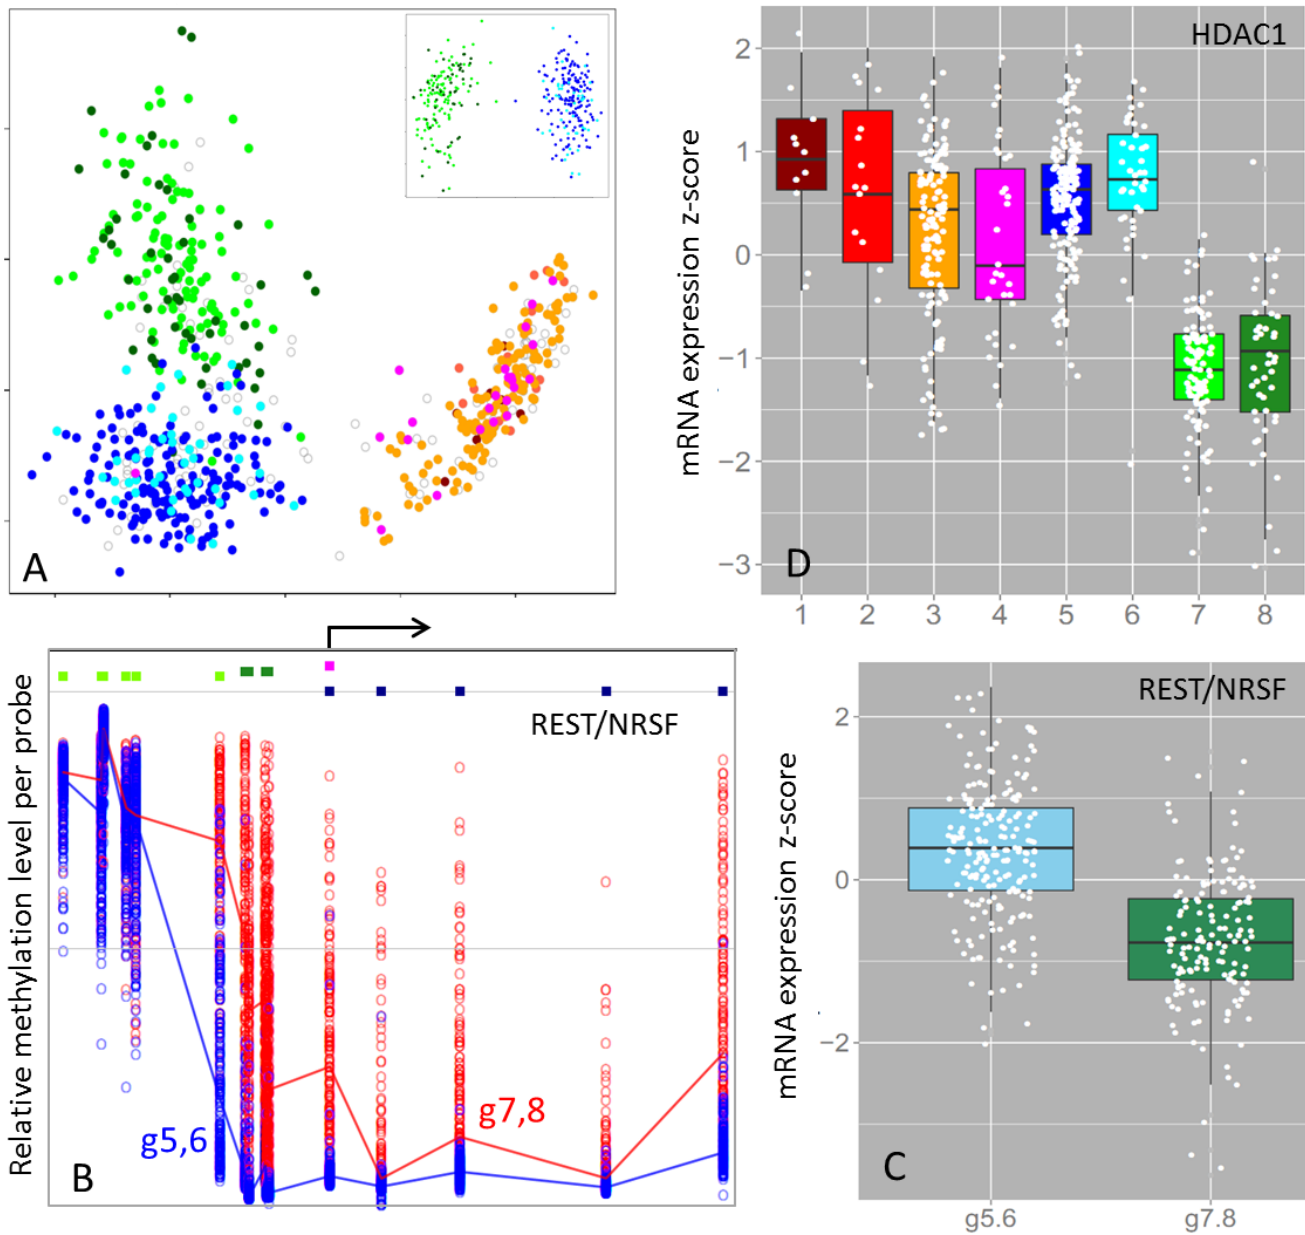

## Supplementary Tables

*Supplementary Table 1.* A set of 396 stemness marker genes were constructed by combining gene sets from Wong et al. Cell Stem Cell. 2008 Apr 10; 2(4): 333–344, and

[http://www.sabiosciences.com/rt\\_pcr\\_product/HTML/PAHS-404A.html](http://www.sabiosciences.com/rt_pcr_product/HTML/PAHS-404A.html).

ABCB7  
ACAD8  
ACHE  
ADH5  
ADORA1  
ADORA2A  
ADSL  
AK3L1  
ALDH7A1  
ALDOC  
ALK  
AMOTL2  
ANP32E  
APBB1  
APEX1  
APOE  
ARNT2  
ASCL1  
ATP5J  
ATP5O  
AURKA  
AURKB  
BAI1  
BANF1  
BAX  
BCAT1  
BDNF  
BIRC5  
BLM  
BMP2  
BMP4  
BMP8B  
BTF3  
BUB1  
BUB1B  
BUB3



C11orf48  
C2orf47  
CBX3  
CCNA2  
CCNB2  
CCNC  
CCND1  
CCND2  
CCNF  
CCT5  
CDC20  
CDC34  
CDC6  
CDC7  
CDCA3  
CDCA5  
CDCA7  
CDCA8  
CDK4  
CDK5R1  
CDK5RAP1  
CDK5RAP2  
CDK5RAP3  
CDKN1C  
CDKN3  
CHAF1A  
CHEK1  
CHEK2  
CHRM2  
CKAP2  
CKS1B  
CKS2  
CLPP  
COQ3  
COX4NB  
COX5B  
CRABP2  
CSE1L  
CSRP2  
CTNNA1  
CTSC  
CXCL1  
CYCS

DAP3  
DARS2  
DBF4  
DDX18  
DEK  
DHX9  
DLAT  
DLG4  
DLL1  
DNMT1  
DPP3  
DRD1  
DRD2  
DTL  
DTYMK  
DVL3  
E2F3  
EBNA1BP2  
ECHS1  
EEF1E1  
EEF2  
EFNB1  
EGF  
EIF2S2  
EIF2S3  
EIF4A1  
EIF4B  
EIF4EBP1  
ELOVL6  
ENO1  
EP300  
ERBB2  
ERCC6L  
ERP29  
ETFA  
EXO1  
EXOSC7  
FAM136A  
FAM60A  
FARSA  
FBL  
FDPS  
FEZ1

FGF13  
FGF2  
FGFR1  
FH  
FLNA  
G3BP1  
GARS  
GART  
GDNF  
GEMIN6  
GJA1  
GLDC  
GLO1  
GMNN  
GNA14  
GNAO1  
GNL3  
GNPDA1  
GPI  
GRIN1  
GSPT2  
GTSE1  
HADH  
HAT1  
HDAC1  
HDAC4  
HDAC7  
HELLS  
HES1  
HEY1  
HEY2  
HEYL  
HMGB2  
HN1  
HNRNPA1  
HSPA14  
HSPA9  
HSPE1  
IARS  
INHBA  
IPO9  
KIF11  
KIF20A

KIF22  
KIF23  
KIF4A  
KPNA2  
KPNA6  
KRAS  
LMNB1  
LSM10  
LSM2  
LSM4  
LSM5  
LYPLA1  
MAD2L1  
MAPK13  
MCM2  
MCM3  
MCM4  
MCM5  
MCM7  
MDK  
MEF2C  
MID1IP1  
MKI67IP  
MLL  
MRPL11  
MRPL12  
MRPL13  
MRPL15  
MRPL16  
MRPL37  
MRPL39  
MRPL4  
MRPS17  
MRPS18B  
MRPS2  
MRPS28  
MRPS30  
MRPS36  
MRTO4  
MSH2  
MTF2  
MTHFD2  
MYBL2

MYC  
NAP1L1  
NASP  
NCAPD2  
NCAPH  
NCBP2  
NCL  
NCOA6  
NDC80  
NDN  
NDP  
NDUFA11  
NDUFA9  
NDUFAB1  
NDUFB10  
NDUFB7  
NDUFB8  
NDUFS2  
NEK2  
NEUROD1  
NIP7  
NIPSNAP1  
NLN  
NME2  
NME4  
NOG  
NONO  
NOTCH2  
NPTX1  
NRCAM  
NRG1  
NRP1  
NRP2  
NT5DC2  
NTHL1  
NTN1  
NUDCD2  
NUP107  
NUSAP1  
ODZ1  
ORC1L  
OTX2  
PA2G4

PABPC1  
PAFAH1B1  
PARD3  
PARD6B  
PARP1  
PAX3  
PAX5  
PAX6  
PCNA  
PDCD2  
PDHA1  
PDIA4  
PDPN  
PHB  
PHC1  
PHF5A  
PIPOX  
PLK1  
PLK4  
POLD1  
POLE2  
POLR2F  
POLR3K  
POP7  
POU3F3  
POU4F1  
PPM1G  
PPP4C  
PRDX1  
PRIM1  
PRIM2  
PRMT1  
PRMT3  
PROM1  
PRPS1  
PSMA5  
PSMA7  
PSMB5  
PSMB6  
PSMD14  
PSME3  
PTN  
PUS1

RAB34  
RAC1  
RACGAP1  
RAD18  
RAD23B  
RCC1  
RCC2  
RCN2  
RFC3  
RNPS1  
ROBO1  
RPA2  
RPA3  
RPL10A  
RPL13  
RPL22  
RPL27A  
RPP40  
RPS12  
RPS16  
RPS19  
RPS23  
RPS27  
RPS3  
RPS5  
RPS8  
RPSA  
RRM1  
RRM2  
RTN4  
RUVBL1  
RUVBL2  
S100A6  
S100B  
SARS  
SDHC  
SDHD  
SEMA4D  
SEPHS2  
SERPINH1  
SET  
SHH  
SIP1

SLC16A1  
SLC25A5  
SLC2A1  
SLIT2  
SMC2  
SMC4  
SNRPA  
SNRPA1  
SNRPD1  
SNX5  
SOX2  
SOX8  
SPAG5  
SQLE  
SS18  
SSB  
STAT3  
STIP1  
STOML2  
SUMO1  
TCF19  
TCF7L1  
TCOF1  
TEAD2  
TERF1  
TGIF1  
TGIF2  
THOC3  
TIMM13  
TIMM44  
TIMM8A  
TIMM8B  
TMEFF1  
TNR  
TOP2A  
TP53  
TRIP13  
TRIP6  
TTK  
U2AF1  
UBE2G1  
UBE2V2  
UGDH



UQCRH  
UTP18  
VBP1  
VEGFA  
VRK1  
WBP11  
WDHD1  
WDR77  
WEE1  
XPO1  
XRCC5  
YAP1  
YWHAH  
YY1  
ZIC3  
ZNF22

*Supplementary Table 2.* Human metabolic genes were downloaded from the Kyoto Encyclopedia of Genes and Genomes ([http://www.genome.jp/dbget-bin/www\\_bget?pathway+hsa01100](http://www.genome.jp/dbget-bin/www_bget?pathway+hsa01100)). For our glioma analyses, to avoid confounding effects, we removed from this list genes associated with specific GBM expression subtypes (1157 genes remained).

A4GALT  
AADAT  
AANAT  
AASS  
ABAT  
ABO  
ACAA1  
ACAA2  
ACACA  
ACACB  
ACAD8  
ACADL  
ACADM  
ACADS  
ACADSB  
ACADVL  
ACAT1  
ACAT2  
ACER1  
ACER2  
ACLY  
ACMSD  
ACO1  
ACO2  
ACOT1  
ACOT2  
ACOT4  
ACOT8  
ACOX1  
ACOX2  
ACOX3  
ACSBG1  
ACSBG2  
ACSL1  
ACSL3  
ACSL4  
ACSL5  
ACSL6

ACSM1  
ACSM2A  
ACSM2B  
ACSM3  
ACSM4  
ACSM5  
ACSS1  
ACSS2  
ACSS3  
ACY1  
ADA  
ADAM29  
adenylate  
ADH1A  
ADH1B  
ADH1C  
ADH4  
ADH5  
ADH6  
ADH7  
ADI1  
ADK  
ADO  
ADPGK  
ADSL  
ADSS  
ADSSL1  
AFMID  
AGK  
AGL  
AGMAT  
AGPAT1  
AGPAT2  
AGPAT3  
AGPAT4  
AGPAT5  
AGPAT6  
AGPAT9  
AGPS  
AGXT  
AGXT2  
AHCY  
AHCYL1

AHCYL2  
AK1  
AK2  
AK4  
AK5  
AK6  
AK7  
AK8  
AK9  
AKR1A1  
AKR1B1  
AKR1B10  
AKR1C3  
AKR1C4  
AKR1D1  
ALAD  
ALAS1  
ALAS2  
ALDH18A1  
ALDH1A1  
ALDH1A2  
ALDH1A3  
ALDH1B1  
ALDH2  
ALDH3A1  
ALDH3A2  
ALDH3B1  
ALDH3B2  
ALDH4A1  
ALDH5A1  
ALDH6A1  
ALDH7A1  
ALDH9A1  
ALDOA  
ALDOB  
ALDOC  
ALG1  
ALG10  
ALG10B  
ALG11  
ALG12  
ALG13  
ALG14

ALG2  
ALG3  
ALG5  
ALG6  
ALG8  
ALG9  
ALLC  
ALOX12  
ALOX12B  
ALOX15  
ALOX15B  
ALOX5  
ALPI  
ALPL  
ALPP  
ALPPL2  
AMACR  
AMD1  
AMDHD1  
AMPD1  
AMPD2  
AMPD3  
AMT  
AMY1A  
AMY1B  
AMY1C  
AMY2A  
AMY2B  
ANPEP  
AOC2  
AOC3  
AOX1  
APIP  
APRT  
ARG1  
ARG2  
ARSB  
ASAH1  
ASAH2  
ASL  
ASMT  
ASNS  
ASPA

ASS1  
ATIC  
ATP5A1  
ATP5B  
ATP5C1  
ATP5D  
ATP5E  
ATP5F1  
ATP5G1  
ATP5G2  
ATP5G3  
ATP5H  
ATP5I  
ATP5J  
ATP5J2  
ATP5L  
ATP5O  
ATP6  
ATP6AP1  
ATP6V0A1  
ATP6V0A2  
ATP6V0A4  
ATP6V0B  
ATP6V0C  
ATP6V0D1  
ATP6V0D2  
ATP6V0E1  
ATP6V0E2  
ATP6V1A  
ATP6V1B1  
ATP6V1B2  
ATP6V1C1  
ATP6V1C2  
ATP6V1D  
ATP6V1E1  
ATP6V1E2  
ATP6V1F  
ATP6V1G1  
ATP6V1G2  
ATP6V1G3  
ATP6V1H  
ATP8  
AUH

AZIN2  
B3GALNT1  
B3GALT1  
B3GALT2  
B3GALT4  
B3GALT5  
B3GALT6  
B3GAT3  
B3GNT2  
B3GNT3  
B3GNT4  
B3GNT5  
B3GNT6  
B4GALNT1  
B4GALT1  
B4GALT2  
B4GALT3  
B4GALT4  
B4GALT6  
B4GALT7  
B4GAT1  
BAAT  
BCAT1  
BCAT2  
BCKDHA  
BCKDHB  
BCO1  
BDH1  
BDH2  
BHMT  
BPGM  
BPNT1  
BST1  
BTD  
C1GALT1  
C1GALT1C1  
CAD  
CBR1  
CBR3  
CBS  
CCBL1  
CCBL2  
CD38

CDA  
CDIPT  
CDO1  
CDS1  
CDS2  
CEL  
CEPT1  
CERS1  
CERS2  
CERS3  
CERS4  
CERS5  
CERS6  
CES1  
CHDH  
CHKA  
CHKB  
CHPF  
CHPF2  
CHPT1  
CHSY1  
CHSY3  
CKB  
CKM  
CKMT1A  
CKMT1B  
CKMT2  
CMAS  
CMBL  
CMPK1  
CMPK2  
CNDP1  
CNDP2  
COASY  
COMT  
COQ2  
COQ3  
COQ5  
COQ6  
COQ7  
COX1  
COX10  
COX11



COX15  
COX17  
COX2  
COX3  
COX411  
COX412  
COX5A  
COX5B  
COX6A1  
COX6A2  
COX6B1  
COX6B2  
COX6C  
COX7B  
COX7B2  
COX7C  
COX8A  
COX8C  
CPOX  
CPS1  
CRLS1  
CRYL1  
CS  
CSAD  
CSGALNACT1  
CSGALNACT2  
CTH  
CTPS1  
CTPS2  
CYC1  
CYCS  
CYP11A1  
CYP11B1  
CYP11B2  
CYP17A1  
CYP19A1  
CYP1A1  
CYP1A2  
CYP21A2  
CYP24A1  
CYP26A1  
CYP26B1  
CYP26C1

CYP27A1  
CYP27B1  
CYP2A6  
CYP2B6  
CYP2C18  
CYP2C19  
CYP2C8  
CYP2C9  
CYP2E1  
CYP2J2  
CYP2R1  
CYP2S1  
CYP2U1  
CYP3A4  
CYP3A5  
CYP3A7  
CYP4A11  
CYP4F2  
CYP4F3  
CYP4F8  
CYP51A1  
CYP7A1  
CYP8B1  
CYTB  
DAD1  
DAK  
DAO  
DBH  
DBT  
DCK  
DCT  
DCTD  
DCTPP1  
DCXR  
DDC  
DDOST  
DEGS1  
DEGS2  
DGAT1  
DGAT2  
DGKA  
DGKB  
DGKD

DGKE  
DGKG  
DGKH  
DGKI  
DGKQ  
DGKZ  
DGUOK  
DHCR24  
DHCR7  
DHFR  
DHFRL1  
DHODH  
DHRS3  
DHRS4  
DHRS4L1  
DHRS4L2  
DHRS9  
DLAT  
DLD  
DLST  
DMGDH  
DNMT1  
DNMT3A  
DNMT3B  
DOLK  
DPAGT1  
DPM1  
DPM2  
DPM3  
DPYD  
DPYS  
DSE  
DTYMK  
DUT  
EARS2  
EBP  
ECHS1  
EHHADH  
ENO1  
ENO2  
ENO3  
ENOPH1  
ENPP1

ENPP3  
ENPP7  
EPHX2  
EPRS  
EPT1  
ETNK1  
ETNK2  
ETNPPL  
EXT1  
EXT2  
EXTL1  
EXTL2  
EXTL3  
FAH  
FAHD1  
FAM213B  
FASN  
FAXDC2  
FBP1  
FBP2  
FDFT1  
FDPS  
FECH  
FH  
FLAD1  
FOLH1  
FPGS  
FPGT  
FTCD  
FUK  
FUT1  
FUT2  
FUT3  
FUT4  
FUT5  
FUT6  
FUT7  
FUT8  
FUT9  
G6PC  
G6PC2  
G6PC3  
G6PD

GAA  
GAD1  
GAD2  
GADL1  
GAL3ST1  
GALC  
GALE  
GALK1  
GALM  
GALNS  
GALNT1  
GALNT10  
GALNT11  
GALNT12  
GALNT13  
GALNT14  
GALNT15  
GALNT16  
GALNT18  
GALNT2  
GALNT3  
GALNT4  
GALNT5  
GALNT6  
GALNT7  
GALNT8  
GALNT9  
GALNTL5  
GALNTL6  
GALT  
GAMT  
GANAB  
GANC  
GAPDH  
GAPDHS  
GART  
GATB  
GATC  
GATM  
GBA  
GBA2  
GBA3  
GBE1

GBGT1  
GCDH  
GCH1  
GCK  
GCLC  
GCLM  
GCNT1  
GCNT2  
GCNT3  
GCNT4  
GDA  
GFPT1  
GFPT2  
GGPS1  
GGT1  
GGT5  
GGT6  
GGT7  
GK  
GK2  
GLB1  
GLCE  
GLDC  
GLS  
GLS2  
GLUD1  
GLUD2  
GLUL  
GLYCK  
GMDS  
GMPPA  
GMPPB  
GMPS  
GNE  
GNPDA1  
GNPDA2  
GNS  
GOT1  
GOT2  
GPAA1  
GPAM  
GPAT2  
GPI

GPT  
GPT2  
GRHPR  
GSS  
GSTZ1  
GUK1  
GUSB  
H6PD  
HAAO  
HADH  
HADHA  
HADHB  
HAL  
HAO1  
HAO2  
HDC  
HEXA  
HEXB  
HGD  
HGSNAT  
HIBADH  
HIBCH  
HK1  
HK2  
HK3  
HKDC1  
HLCS  
HMBS  
HMGCL  
HMGCLL1  
HMGCR  
HMGCS1  
HMGCS2  
HOGA1  
HPD  
HPGDS  
HPRT1  
HPSE  
HPSE2  
HSD11B1  
HSD17B1  
HSD17B10  
HSD17B12

HSD17B2  
HSD17B3  
HSD17B4  
HSD17B6  
HSD17B7  
HSD17B8  
HSD3B1  
HSD3B2  
HSD3B7  
HYAL1  
HYAL2  
HYAL3  
HYAL4  
HYI  
HYKK  
IDH1  
IDH2  
IDH3A  
IDH3B  
IDH3G  
IDI1  
IDI2  
IDNK  
IDO1  
IDO2  
IDS  
IDUA  
IL4I1  
IMPA1  
IMPA2  
IMPAD1  
IMPDH1  
IMPDH2  
INPP1  
INPP4A  
INPP4B  
INPP5A  
INPP5B  
INPP5E  
INPP5J  
INPP5K  
IPPK  
ISYNA1



ITPA  
ITPK1  
ITPKA  
ITPKB  
ITPKC  
IVD  
JMJD7-PLA2G4B  
KDSR  
KHK  
KL  
KLF15  
KMO  
KYNU  
LALBA  
LAP3  
LCLAT1  
LCT  
LDHA  
LDHAL6A  
LDHAL6B  
LDHB  
LDHC  
LIAS  
LIPC  
LIPF  
LIPG  
LIPT1  
LIPT2  
LPCAT1  
LPCAT2  
LPCAT4  
LPIN1  
LPIN2  
LPIN3  
LSS  
LTA4H  
LTC4S  
MAN1A1  
MAN1A2  
MAN1B1  
MAN1C1  
MAN2A1  
MAN2A2

MAOA  
MAOB  
MAT1A  
MAT2A  
MAT2B  
MBOAT1  
MBOAT2  
MCAT  
MCCC1  
MCCC2  
MCEE  
MDH1  
MDH2  
ME1  
ME3  
MECR  
MGAM  
MGAT1  
MGAT2  
MGAT3  
MGAT4A  
MGAT4B  
MGAT4C  
MGAT4D  
MGAT5  
MGAT5B  
MGLL  
MINPP1  
MLYCD  
MMAB  
MOCS1  
MOCS2  
MOGAT3  
MOGS  
MPI  
MPST  
MRI1  
MSMO1  
MTAP  
MTHFD1  
MTHFD1L  
MTHFD2  
MTHFD2L

MTHFR  
MTHFS  
MTM1  
MTR  
MUT  
MVD  
MVK  
NADK  
NADSYN1  
NAGLU  
NAGS  
NAMPT  
NANP  
NANS  
NAPRT  
NAT1  
NAT2  
NAT8L  
ND1  
ND2  
ND3  
ND4  
ND4L  
ND5  
ND6  
NDST1  
NDST2  
NDST3  
NDST4  
NDUFA1  
NDUFA10  
NDUFA11  
NDUFA12  
NDUFA13  
NDUFA2  
NDUFA3  
NDUFA4  
NDUFA4L2  
NDUFA5  
NDUFA6  
NDUFA7  
NDUFA8  
NDUFA9

NDUFAB1  
NDUFB1  
NDUFB10  
NDUFB11  
NDUFB2  
NDUFB3  
NDUFB4  
NDUFB5  
NDUFB6  
NDUFB7  
NDUFB8  
NDUFB9  
NDUFC1  
NDUFC2  
NDUFC2-KCTD14  
NDUFS1  
NDUFS2  
NDUFS3  
NDUFS4  
NDUFS5  
NDUFS6  
NDUFS7  
NDUFS8  
NDUFV1  
NDUFV2  
NDUFV3  
NFS1  
NME1  
NME1-NME2  
NME2  
NME3  
NME4  
NME5  
NME6  
NME7  
NMNAT1  
NMNAT2  
NMNAT3  
NMRK1  
NMRK2  
NNMT  
NNT  
NOS1

NOS2  
NOS3  
NSDHL  
NT5C  
NT5C1A  
NT5C1B  
NT5C1B-RDH14  
NT5C2  
NT5C3A  
NT5C3B  
NT5E  
NT5M  
NTPCR  
OAT  
OCRL  
ODC1  
OGDH  
OGDHL  
OLAH  
OTC  
OXSM  
P4HA1  
P4HA2  
P4HA3  
PAFAH1B1  
PAFAH1B2  
PAFAH1B3  
PAFAH2  
PAH  
PAICS  
PANK1  
PANK2  
PANK3  
PANK4  
PAPSS1  
PAPSS2  
PC  
PCCA  
PCCB  
PCK1  
PCK2  
PCYT1A  
PCYT1B

PCYT2  
PDHA1  
PDHA2  
PDHB  
PDHX  
PDXK  
PDXP  
PEMT  
PFAS  
PFKL  
PFKM  
PFKP  
PGAM1  
PGAM2  
PGAM4  
PGAP1  
PGD  
PGK1  
PGK2  
PGLS  
PGM1  
PGM2  
PGP  
PGS1  
PHGDH  
PHOSPHO1  
PHOSPHO2  
PHYKPL  
PI4K2A  
PI4K2B  
PI4KA  
PI4KB  
PIGA  
PIGB  
PIGC  
PIGF  
PIGH  
PIGK  
PIGL  
PIGM  
PIGN  
PIGO  
PIGP

PIGQ  
PIGS  
PIGT  
PIGU  
PIGV  
PIGW  
PIGX  
PIGY  
PIK3C2A  
PIK3C2B  
PIK3C2G  
PIK3C3  
PIP5K1A  
PIP5K1B  
PIP5K1C  
PIP5KL1  
PIPOX  
PISD  
PKLR  
PKM  
PLA2G10  
PLA2G12A  
PLA2G12B  
PLA2G16  
PLA2G1B  
PLA2G2A  
PLA2G2C  
PLA2G2D  
PLA2G2E  
PLA2G2F  
PLA2G3  
PLA2G4A  
PLA2G4B  
PLA2G4C  
PLA2G4D  
PLA2G4E  
PLA2G4F  
PLA2G5  
PLA2G6  
PLA2G7  
PLB1  
PLCB1  
PLCB2

PLCB3  
PLCB4  
PLCD1  
PLCD3  
PLCD4  
PLCE1  
PLCG1  
PLCG2  
PLCH1  
PLCH2  
PLCZ1  
PLD1  
PLD2  
PLD3  
PLD4  
PMM1  
PMM2  
PMVK  
PNLIP  
PNLIPRP1  
PNLIPRP2  
PNLIPRP3  
PNMT  
PNP  
PNPLA2  
PNPLA3  
PNPO  
POC1B-GALNT4  
POLA1  
POLA2  
POLD1  
POLD2  
POLD3  
POLD4  
POLE  
POLE2  
POLE3  
POLE4  
POLG  
POLG2  
POLR1A  
POLR1B  
POLR1C



POLR1D  
POLR1E  
POLR2A  
POLR2B  
POLR2C  
POLR2D  
POLR2E  
POLR2F  
POLR2G  
POLR2H  
POLR2I  
POLR2J  
POLR2J2  
POLR2J3  
POLR2K  
POLR2L  
POLR3A  
POLR3B  
POLR3C  
POLR3D  
POLR3F  
POLR3G  
POLR3GL  
POLR3H  
POLR3K  
PON1  
PON2  
PON3  
PPAP2A  
PPAP2B  
PPAP2C  
PPAT  
PPCDC  
PPCS  
PPOX  
PPT1  
PPT2  
PRDX6  
PRIM1  
PRIM2  
PRODH  
PRODH2  
proline

PRPS1  
PRPS1L1  
PRPS2  
PSAT1  
PSPH  
PTDSS1  
PTDSS2  
PTGDS  
PTGES  
PTGES2  
PTGES3  
PTGIS  
PTGS1  
PTGS2  
PTS  
PYCR1  
PYCR2  
PYCRL  
PYGB  
PYGL  
PYGM  
QARS  
QDPR  
QPRT  
QRSL1  
RDH10  
RDH11  
RDH12  
RDH16  
RDH8  
REV3L  
RFK  
RGN  
RIMKLA  
RIMKLB  
RPE  
RPEL1  
RPIA  
RPN1  
RPN2  
RRM1  
RRM2  
RRM2B

SARDH  
SAT1  
SAT2  
SC5D  
SCLY  
SCP2  
SDHA  
SDHB  
SDHC  
SDHD  
SDS  
SDSL  
SEPHS1  
SEPHS2  
SGMS1  
SGMS2  
SGPL1  
SGSH  
SHMT1  
SHMT2  
SI  
SLC27A5  
SLC33A1  
SMPD1  
SMPD2  
SMPD3  
SMPD4  
SMS  
SORB  
SPAM1  
SPHK1  
SPHK2  
SPR  
SPTLC1  
SPTLC2  
SPTLC3  
SQLE  
SRM  
ST20-MTHFS  
ST3GAL1  
ST3GAL2  
ST3GAL3  
ST3GAL4

ST3GAL5  
ST3GAL6  
ST6GAL1  
ST6GAL2  
ST6GALNAC1  
ST6GALNAC3  
ST6GALNAC4  
ST6GALNAC5  
ST6GALNAC6  
ST8SIA1  
ST8SIA5  
STT3A  
STT3B  
SUCLA2  
SUCLG1  
SUCLG2  
SYNJ1  
SYNJ2  
TALDO1  
TAT  
TBXAS1  
TCIRG1  
TDO2  
TGDS  
TH  
THTPA  
TK1  
TK2  
TKT  
TKTL1  
TKTL2  
TM7SF2  
TPH1  
TPH2  
TPI1  
TPK1  
TPO  
TRAK2  
TREH  
TRIT1  
TST  
TSTA3  
TUSC3

TWISTNB  
TYMP  
TYMS  
TYR  
TYRP1  
UAP1  
UAP1L1  
UCK1  
UCK2  
UCKL1  
UGCG  
UGDH  
UGP2  
UGT1A1  
UGT1A10  
UGT1A3  
UGT1A4  
UGT1A5  
UGT1A6  
UGT1A7  
UGT1A8  
UGT1A9  
UGT2A1  
UGT2A2  
UGT2A3  
UGT2B10  
UGT2B11  
UGT2B15  
UGT2B17  
UGT2B28  
UGT2B4  
UGT2B7  
UGT8  
UMPS  
UPB1  
UPP1  
UPP2  
UPRT  
UQCR10  
UQCR11  
UQCRB  
UQCRC1  
UQCRC2

UQCRFS1  
UQCRH  
UQCRHL  
UQCRQ  
URAD  
UROC1  
UROD  
UROS  
UXS1  
WBSCR17  
XDH  
XYLB  
XYLT1  
XYLT2  
ZNRD1

*Supplementary Table 3.* A list of the 45 genes with the highest impact on the layout of the SNA.CNA sample similarity plot.

ImpactScore was calculated as the change in the sum of all inter-sample distances in similarity plots obtained before and after removing the named gene. 45 genes with the highest impact scores are listed below.

| <b>Gene</b>      | <b>ImpactScore (A.U.)</b> |
|------------------|---------------------------|
| <b>IDH1</b>      | 94.62573562               |
| <b>TP53</b>      | 55.72199052               |
| <b>ATRX</b>      | 21.04492661               |
| <b>TTN</b>       | 9.33324746                |
| <b>PTEN</b>      | 6.245538775               |
| <b>EGFR</b>      | 5.894697455               |
| <b>CIC</b>       | 5.780078948               |
| <b>FRG1B</b>     | 3.645510755               |
| <b>MUC16</b>     | 3.128916005               |
| <b>PIK3CA</b>    | 2.358006173               |
| <b>PIK3R1</b>    | 1.465046184               |
| <b>RYR2</b>      | 1.409495785               |
| <b>NBPF10</b>    | 1.19814325                |
| <b>MUC17</b>     | 1.198142084               |
| <b>HSD17B7P2</b> | 1.148019803               |
| <b>BAGE2</b>     | 1.051021315               |
| <b>PCDHGC5</b>   | 1.004144669               |
| <b>MTFR1</b>     | 0.992275126               |
| <b>GPRIN1</b>    | 0.992041129               |
| <b>SUSD2</b>     | 0.991982686               |
| <b>PCSK7</b>     | 0.991981885               |
| <b>BFSP1</b>     | 0.9919601                 |
| <b>SFRP2</b>     | 0.991951325               |
| <b>APOL5</b>     | 0.991946108               |
| <b>NTN3</b>      | 0.991942754               |
| <b>AGXT2</b>     | 0.991941791               |
| <b>ADIPOR1</b>   | 0.991939614               |
| <b>FBXL20</b>    | 0.991939231               |
| <b>KDM2A</b>     | 0.991938837               |
| <b>SLC13A4</b>   | 0.991938692               |
| <b>TMEM177</b>   | 0.991938663               |
| <b>KHNYN</b>     | 0.991938663               |
| <b>WTAP</b>      | 0.991938663               |
| <b>SEMA6C</b>    | 0.991938663               |

|               |             |
|---------------|-------------|
| <b>TNRC6B</b> | 0.991938663 |
| <b>RNF10</b>  | 0.991938663 |
| <b>CDC16</b>  | 0.991938663 |
| <b>PEX3</b>   | 0.991938663 |
| <b>MSX1</b>   | 0.991938663 |
| <b>HCN3</b>   | 0.991938663 |
| <b>SEMA3F</b> | 0.991938663 |
| <b>FAM73A</b> | 0.991938663 |
| <b>TSPAN4</b> | 0.991938663 |
| <b>PHF13</b>  | 0.991938663 |
| <b>DARS2</b>  | 0.991938663 |



*Supplementary Table 4.* Genes that are both differentially expressed and differentially methylated between the two CIMP-LGG groups.

**111 genes Diff. exp. & diff. Me. across 2 LGG clusters**

ACCN1  
AR  
ASCL2  
BARHL1  
BARHL2  
BATF3  
BMP8B  
BNC1  
C14orf23  
C2orf67  
C5orf38  
C6orf138  
C7orf13  
C8orf56  
CACHD1  
CBX2  
CELSR1  
CMTM7  
CREB3L4  
CRHR1  
CRYBA2  
CYGB  
CYP24A1  
D4S234E  
DDC  
DLX4  
DUOXA1  
FAM84A  
FLJ45983  
FOXA1  
FOXE3  
FXYD7  
GAD2  
GFPT2  
GPR120  
GPR6  
GRPEL2  
HAS2  
HAS2AS

**TF subset**

AR  
ASCL2  
BARHL1  
BARHL2  
BATF3  
BNC1  
CREB3L4  
DLX4  
FOXA1  
FOXE3  
HOXA13  
HOXC4  
HOXD8  
IKZF1  
LHX1  
LMX1A  
MESP2  
MKX  
MLXIPL  
NKX2-4  
OSR2  
PITX3  
POU4F1  
POU4F2  
PYDC1  
REST  
SALL3  
SIX2  
TFAP2E  
TLX1

HCN4  
HCRTR1  
HIST1H2AG  
HLA-DMA  
HOXA13  
HOXC4  
HOXD8  
HTR6  
IKZF1  
IRX1  
IRX2  
IRX5  
KCNB2  
KCNS2  
LEKR1  
LHX1  
LHX5  
LHX9  
LMX1A  
LOC91149  
LRR10B  
LRR13  
MAP3K9  
MESP2  
MKX  
MLXIP  
NKX2-4  
NOS1  
OSR2  
PCDH20  
PDE8A  
PHACTR1  
PIK3R5  
PITX3  
PLD5  
POU4F1  
POU4F2  
PRCD  
PRDM13  
PRLHR  
PYDC1  
**REST**  
RIBC2

RNF182  
RNF32  
RNF39  
SALL3  
SCGBL  
SELV  
SIX2  
SLC35D3  
SLC35F1  
SLC6A3  
SLC7A14  
SMC1B  
SPRY4  
ST8SIA2  
SYCE2  
SYT9  
TAS1R1  
TFAP2E  
TLR5  
TLX1  
TMC8  
TRIM67  
TSPAN32  
USP44  
WNT9B  
YBX2  
ZIC5  
ZNF662  
ZNF876P

*Supplementary Table 5.* 22 genes associated with GPCR signaling. 22 GPCR genes.

| Gene      | Organism     | Collection | TargetMine Integrated Pathway                                                                                                 |
|-----------|--------------|------------|-------------------------------------------------------------------------------------------------------------------------------|
| AR        | Homo sapiens | H002       | GPCR ligand binding Neuronal System G alpha (i) signalling events cAMP signaling pathway Calcium signaling pathway Alcoholism |
| ASIC2     | Homo sapiens | H002       | GPCR ligand binding Neuronal System G alpha (i) signalling events cAMP signaling pathway Calcium signaling pathway Alcoholism |
| CREB3L4   | Homo sapiens | H002       | GPCR ligand binding Neuronal System G alpha (i) signalling events cAMP signaling pathway Calcium signaling pathway Alcoholism |
| CRHR1     | Homo sapiens | H002       | GPCR ligand binding Neuronal System G alpha (i) signalling events cAMP signaling pathway Calcium signaling pathway Alcoholism |
| DDC       | Homo sapiens | H002       | GPCR ligand binding Neuronal System G alpha (i) signalling events cAMP signaling pathway Calcium signaling pathway Alcoholism |
| FFAR4     | Homo sapiens | H002       | GPCR ligand binding Neuronal System G alpha (i) signalling events cAMP signaling pathway Calcium signaling pathway Alcoholism |
| GAD2      | Homo sapiens | H002       | GPCR ligand binding Neuronal System G alpha (i) signalling events cAMP signaling pathway Calcium signaling pathway Alcoholism |
| HCN4      | Homo sapiens | H002       | GPCR ligand binding Neuronal System G alpha (i) signalling events cAMP signaling pathway Calcium signaling pathway Alcoholism |
| HCRTR1    | Homo sapiens | H002       | GPCR ligand binding Neuronal System G alpha (i) signalling events cAMP signaling pathway Calcium signaling pathway Alcoholism |
| HIST1H2AG | Homo sapiens | H002       | GPCR ligand binding Neuronal System G alpha (i) signalling events cAMP signaling pathway Calcium signaling pathway Alcoholism |
| HTR6      | Homo sapiens | H002       | GPCR ligand binding Neuronal System G alpha (i) signalling events cAMP signaling pathway Calcium signaling pathway Alcoholism |
| KCNB2     | Homo sapiens | H002       | GPCR ligand binding Neuronal System G alpha (i) signalling events cAMP signaling pathway Calcium signaling pathway Alcoholism |
| KCNS2     | Homo sapiens | H002       | GPCR ligand binding Neuronal System G alpha (i) signalling events cAMP signaling pathway Calcium signaling pathway Alcoholism |
| MLXIPL    | Homo sapiens | H002       | GPCR ligand binding Neuronal System G alpha (i) signalling events cAMP signaling pathway Calcium signaling pathway Alcoholism |
| NOS1      | Homo sapiens | H002       | GPCR ligand binding Neuronal System G alpha (i) signalling events cAMP signaling pathway Calcium signaling pathway Alcoholism |
| PDE8A     | Homo sapiens | H002       | GPCR ligand binding Neuronal System G alpha (i) signalling events cAMP signaling pathway Calcium signaling pathway Alcoholism |
| PIK3R5    | Homo sapiens | H002       | GPCR ligand binding Neuronal System G alpha (i) signalling events cAMP signaling pathway Calcium signaling pathway Alcoholism |
| PRLHR     | Homo sapiens | H002       | GPCR ligand binding Neuronal System G alpha (i) signalling events cAMP signaling pathway Calcium signaling pathway Alcoholism |
| SLC6A3    | Homo sapiens | H002       | GPCR ligand binding Neuronal System G alpha (i) signalling events cAMP signaling pathway Calcium signaling pathway Alcoholism |
| SMC1B     | Homo sapiens | H002       | GPCR ligand binding Neuronal System G alpha (i) signalling events cAMP signaling pathway Calcium signaling pathway Alcoholism |
| TAS1R1    | Homo sapiens | H002       | GPCR ligand binding Neuronal System G alpha (i) signalling events cAMP signaling pathway Calcium signaling pathway Alcoholism |
| WNT9B     | Homo sapiens | H002       | GPCR ligand binding Neuronal System G alpha (i) signalling events cAMP signaling pathway Calcium signaling pathway Alcoholism |
